# Supplementary material for: In situ construction of α-Bi2O3/g-C3N4/β-Bi2O3composites and their highly efficient photocatalytic performances
Source: Royal Society of Chemistry journal article supplement (doi:10.1039/c5ra18420g), 2015-01-01
Supplement: c5ra18420g1.pdf [file c5ra18420g1.pdf]

## Supporting information

### In-situ Constructing $\alpha$ -Bi<sub>2</sub>O<sub>3</sub>/g-C<sub>3</sub>N<sub>4</sub>/ $\beta$ -Bi<sub>2</sub>O<sub>3</sub> Composites and Their Highly Efficient Photocatalytic Performances

Hai-Ying Jiang<sup>a, b</sup>, Guigao liu<sup>b</sup>, Tao Wang<sup>b</sup>, Peng Li<sup>b</sup>, Jun Lin<sup>\*a</sup>, and Jinhua Ye<sup>\*b</sup>

<sup>a</sup> Department of Chemistry, Renmin University of China, Beijing 100872, People's Republic of China

<sup>b</sup> Research Unit for Environmental Remediation Materials, National Institute for Materials Science (NIMS), 1-1, Namiki, Tsukuba, Ibaraki 305-0044, Japan

To whom correspondence should be addressed. E-mail: jlin@chem.ruc.edu.cn

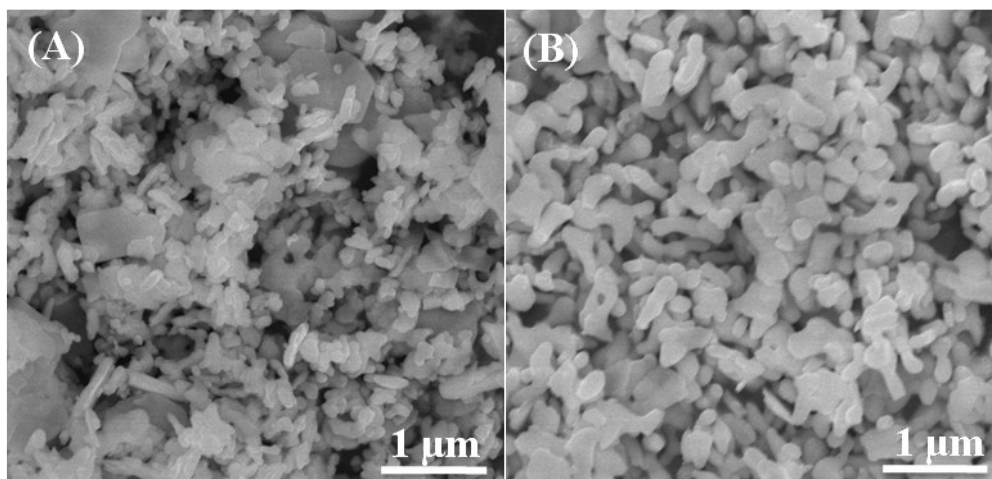

Fig.S1 SEM spectra of nano  $\alpha$ -Bi<sub>2</sub>O<sub>3</sub> (A) and  $\beta$ -Bi<sub>2</sub>O<sub>3</sub> (B)
